# Supplementary material for: Electronic structure modification of metal phthalocyanines by a carbon nanotube support for efficient oxygen reduction to hydrogen peroxide
Source: Royal Society of Chemistry journal article supplement (doi:10.1039/d4nr00250d), 2024-01-01
Supplement: d4nr00250d1.pdf [file d4nr00250d1.pdf]

**Electronic Supplementary Information**

Electronic Structure Modification of Metal  
Phthalocyanines by Carbon Nanotube Support for  
Efficient Oxygen Reduction to Hydrogen Peroxide

Yesol Lee,<sup>‡a</sup> Chaehyeon Lee,<sup>‡b</sup> Seoin Back,<sup>\*b</sup> and Young Jin Sa<sup>\*a</sup>

<sup>a</sup>Department of Chemistry, Kwangwoon University, Seoul 01897, Republic of Korea.

<sup>b</sup>Department of Chemical and Biomolecular Engineering, Institute of Emergent Materials,  
Sogang University, Seoul 04107, Republic of Korea.

Corresponding Authors

\*E-mail: youngjinsa@kw.ac.kr (Y.J.S.); sback@sogang.ac.kr (S.B.)

<sup>‡</sup>These authors contributed equally to this work.

## Supplementary Figures and Tables

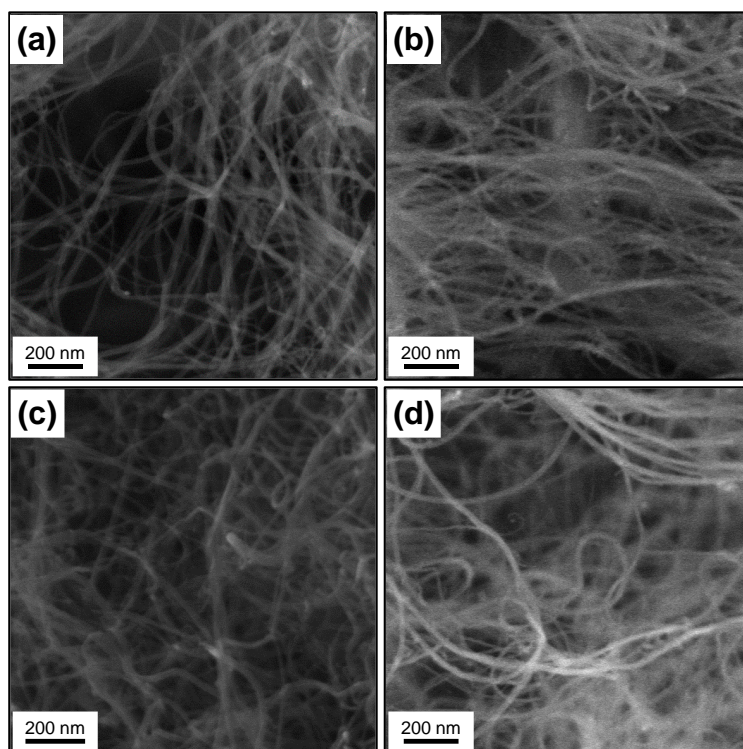

**Fig. S1.** SEM images of (a) CNT, (b) CoPc/CNT, (c) MnPc/CNT, and (d) FePc/CNT.

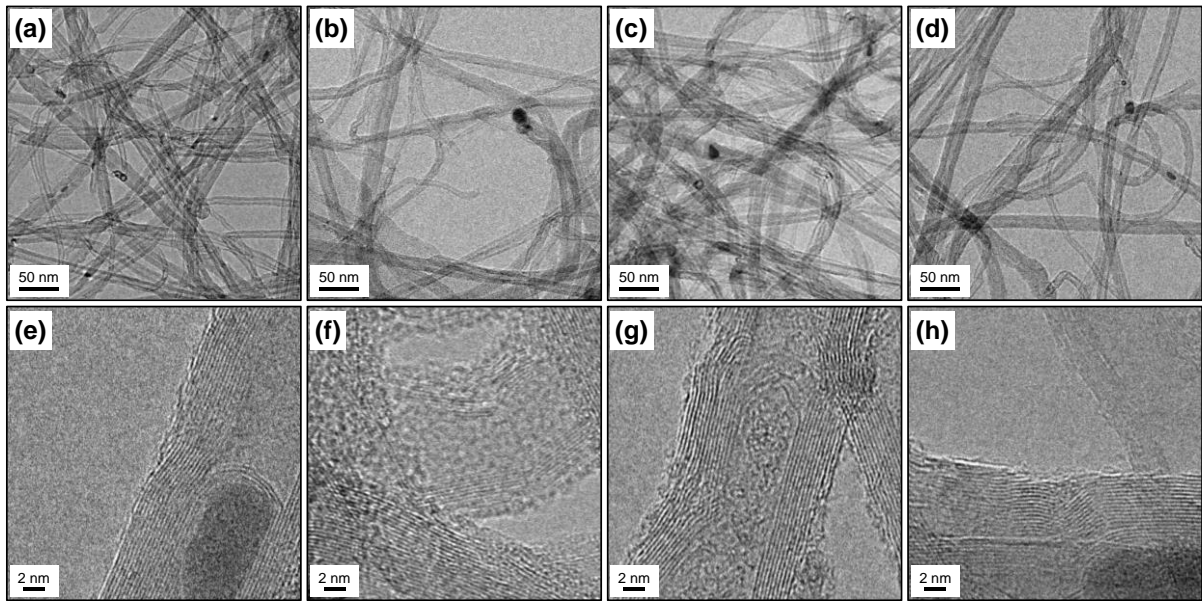

**Fig. S2.** TEM images of (a) CNT, (b) CoPc/CNT, (c) MnPc/CNT, and (d) FePc/CNT, and high-resolution TEM images of (e) CNT, (f) CoPc/CNT, (g) MnPc/CNT, and (h) FePc/CNT.

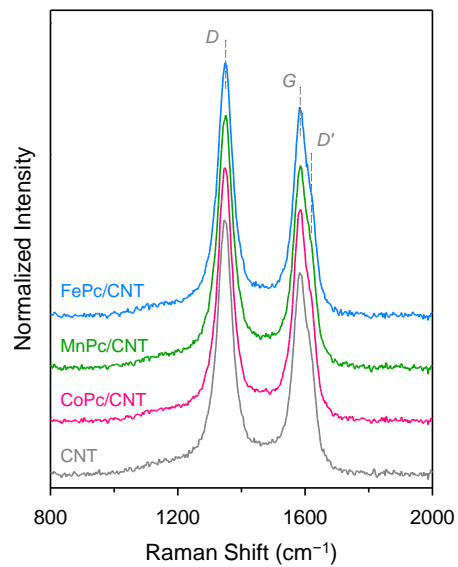

**Fig. S3.** Raman spectra of CNT, CoPc/CNT, MnPc/CNT, and FePc/CNT.

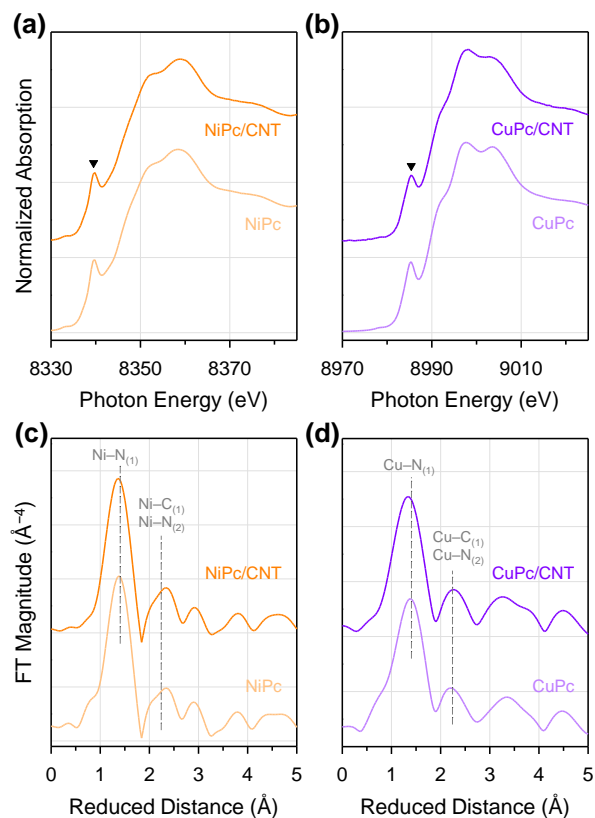

**Fig. S4.** (a) Ni *K*-edge XANES spectra of NiPc/CNT and NiPc and (b) Cu *K*-edge XANES spectra of CuPc/CNT and CuPc. The inverted triangle indicates the pre-edge peak for  $D_{4h}$  symmetry. Radial distribution functions obtained from Fourier transform of  $k^3$ -weighted EXAFS spectra of (c) NiPc/CNT and NiPc and (d) CuPc/CNT and CuPc.

**Table S1.** ICP-MS results for MPc/CNT.

| <b>Catalyst</b> | <b>M (ppm)</b>          | <b>MPc (wt%)</b> |
|-----------------|-------------------------|------------------|
| CoPc/CNT        | 2560                    | 2.5              |
| FePc/CNT        | 3670<br>(1920 from CNT) | 1.8              |
| MnPc/CNT        | 2180                    | 2.3              |
| NiPc/CNT        | 2330                    | 2.3              |
| CuPc/CNT        | 1970                    | 1.8              |
| CNT             | 1920                    | -                |

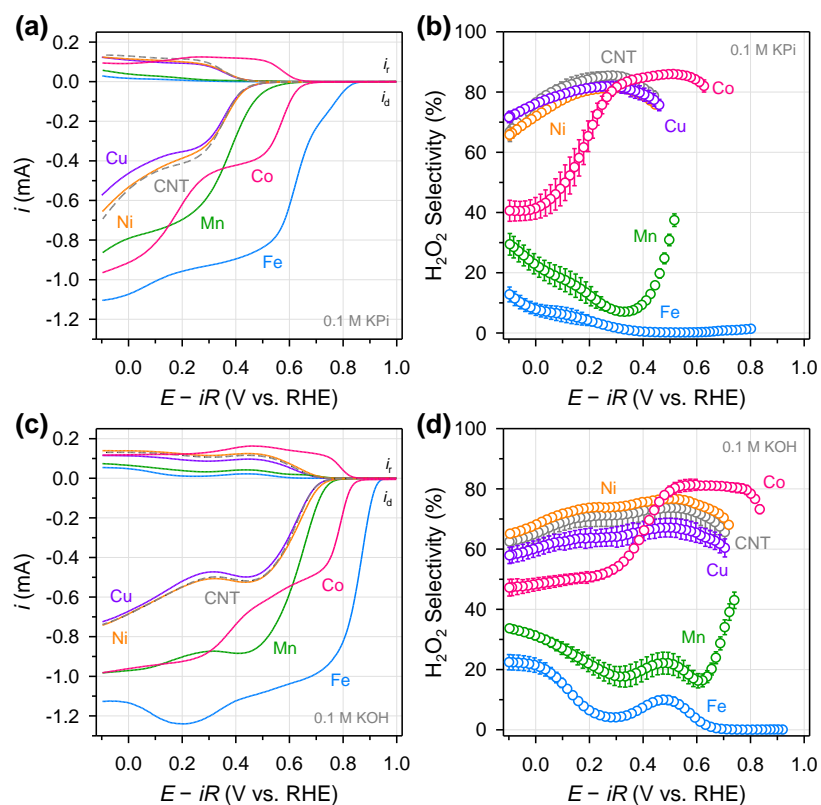

**Fig. S5.** (a) RRDE voltammograms of MPC/CNT measured in O<sub>2</sub>-saturated 0.1 M KPi (pH 8) and (b) the corresponding H<sub>2</sub>O<sub>2</sub> selectivity calculated from the RRDE analysis. (c) RRDE voltammograms of MPC/CNT measured in O<sub>2</sub>-saturated 0.1 M KOH and (d) the corresponding H<sub>2</sub>O<sub>2</sub> selectivity calculated from the RRDE analysis.

**Table S2.** Summary of ORR onset potentials of MPc/CNT and MPc in 0.1 M KPi (pH 8) and 0.1 M KOH. The onset potential was defined at the potential where the current density of 50  $\mu\text{g cm}^{-2}$  was obtained.

| <b>Catalyst</b> | <b><math>E_{\text{onset}}</math> (V vs. RHE)<br/>in 0.1 M KPi (pH 8)</b> | <b><math>E_{\text{onset}}</math> (V vs. RHE)<br/>in 0.1 M KOH</b> |
|-----------------|--------------------------------------------------------------------------|-------------------------------------------------------------------|
| CoPc/CNT        | $0.663 \pm 0.003$                                                        | $0.861 \pm 0.002$                                                 |
| CoPc            | $0.497 \pm 0.038$                                                        | $0.800 \pm 0.019$                                                 |
| FePc/CNT        | $0.835 \pm 0.004$                                                        | $0.938 \pm 0.002$                                                 |
| FePc            | $0.577 \pm 0.110$                                                        | $0.886 \pm 0.002$                                                 |
| MnPc/CNT        | $0.576 \pm 0.016$                                                        | $0.768 \pm 0.004$                                                 |
| MnPc            | $0.334 \pm 0.025$                                                        | $0.715 \pm 0.002$                                                 |
| NiPc/CNT        | $0.479 \pm 0.002$                                                        | $0.750 \pm 0.003$                                                 |
| NiPc            | $0.308 \pm 0.012$                                                        | $0.724 \pm 0.003$                                                 |
| CuPc/CNT        | $0.483 \pm 0.008$                                                        | $0.733 \pm 0.006$                                                 |
| CuPc            | $0.288 \pm 0.031$                                                        | $0.717 \pm 0.007$                                                 |
| CNT             | $0.476 \pm 0.015$                                                        | $0.732 \pm 0.002$                                                 |



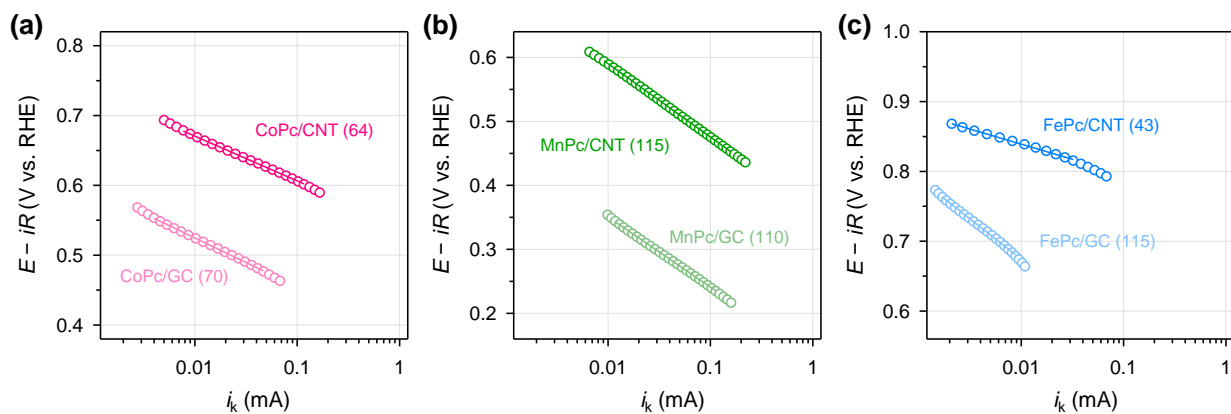

**Fig. S6.** Tafel plots for (a) CoPc/CNT and CoPc/GC, (b) MnPc/CNT and MnPc/GC, and (c) FePc/CNT and FePc/GC measured in 0.1 M KPi (pH 8). The numbers in the parenthesis indicate the Tafel slopes in mV dec<sup>-1</sup>.

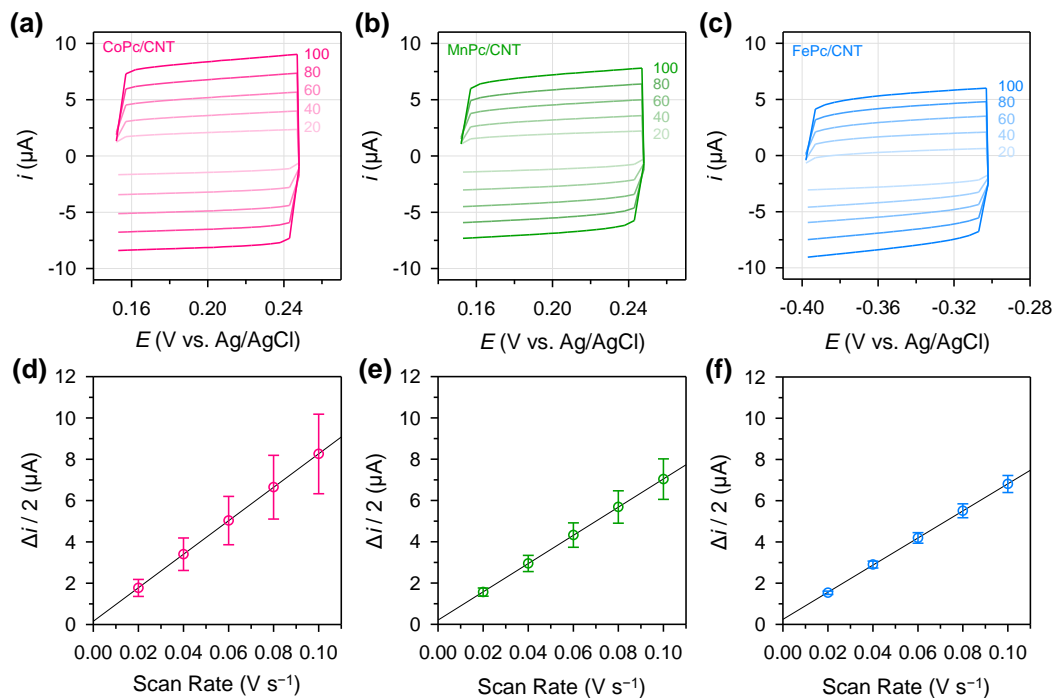

**Fig. S7.** Cyclic voltammetry (CV) curves of (a) CoPc/CNT, (b) MnPc/CNT, and (c) FePc/CNT measured in  $N_2$ -saturated 0.1 M KPi (pH 8) at different potential scan rates. The numbers indicate the scan rates in  $mV s^{-1}$ . The half of the height of the CV curve as a function of the scan rates for (d) CoPc/CNT, (e) MnPc/CNT, and (f) FePc/CNT. The slope corresponds to the double layer capacitance summarized in **Table S3**.

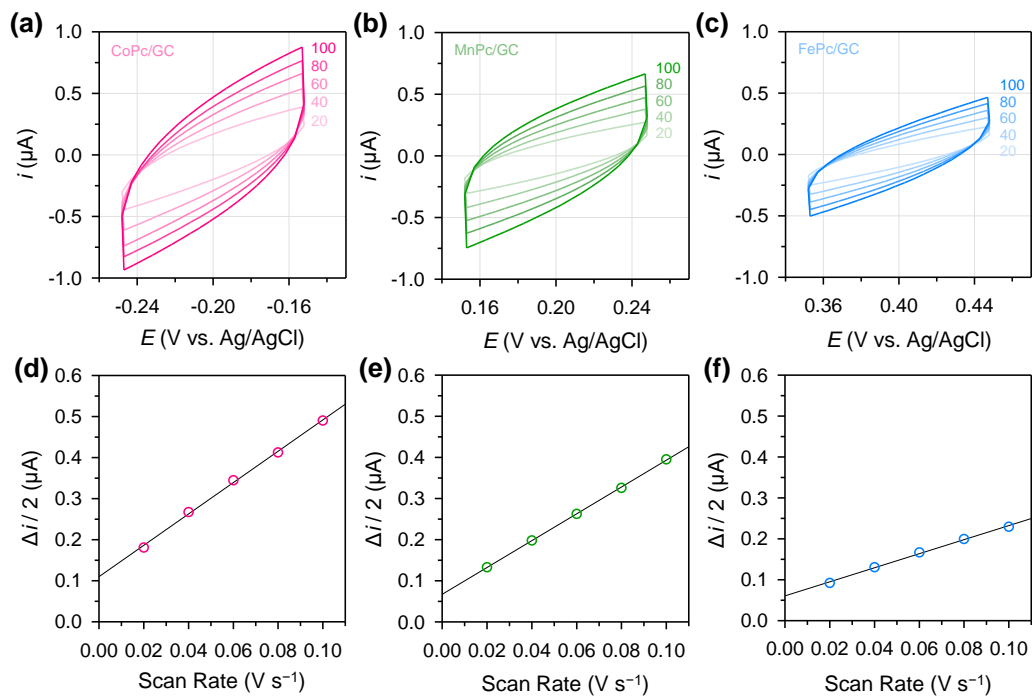

**Fig. S8.** CV curves of (a) CoPc/GC, (b) MnPc/GC, and (c) FePc/GC measured in  $\text{N}_2$ -saturated 0.1 M KPi (pH 8) at different potential scan rates. The numbers indicate the scan rates in  $\text{mV s}^{-1}$ . The half of the height of the CV curve as a function of the scan rates for (d) CoPc/GC, (e) MnPc/GC, and (f) FePc/GC. The slope corresponds to the double layer capacitance summarized in **Table S3**.

**Table S3.** Summary of double layer capacitance ( $C_{dl}$ ) and electrochemically active surface area (ECSA) of MPc/CNT and MPc/GC obtained from the CV analysis at different scan rates in 0.1 M KPi (pH 8) and 0.1 M KOH electrolytes. Specific capacitance of  $20 \mu\text{F cm}^{-2}_{cat}$  was used to calculate ECSA from  $C_{dl}$ .

| <b>Catalyst</b> | <b><math>C_{dl}</math> (<math>\mu\text{F}</math>)<br/>0.1 M KPi</b> | <b>ECSA (<math>\text{cm}^2_{cat}</math>)<br/>0.1 M KPi</b> | <b><math>C_{dl}</math> (<math>\mu\text{F}</math>)<br/>0.1 M KOH</b> | <b>ECSA (<math>\text{cm}^2_{cat}</math>)<br/>0.1 M KOH</b> |
|-----------------|---------------------------------------------------------------------|------------------------------------------------------------|---------------------------------------------------------------------|------------------------------------------------------------|
| CoPc/CNT        | 81.1                                                                | 4.1                                                        | 83.8                                                                | 4.2                                                        |
| CoPc            | 3.82                                                                | 0.19                                                       | 4.75                                                                | 0.24                                                       |
| MnPc/CNT        | 68.4                                                                | 3.4                                                        | 85.4                                                                | 4.3                                                        |
| MnPc            | 3.26                                                                | 0.16                                                       | 10.0                                                                | 0.50                                                       |
| FePc/CNT        | 65.8                                                                | 3.3                                                        | 109.6                                                               | 5.5                                                        |
| FePc            | 1.72                                                                | 0.09                                                       | 7.45                                                                | 0.37                                                       |

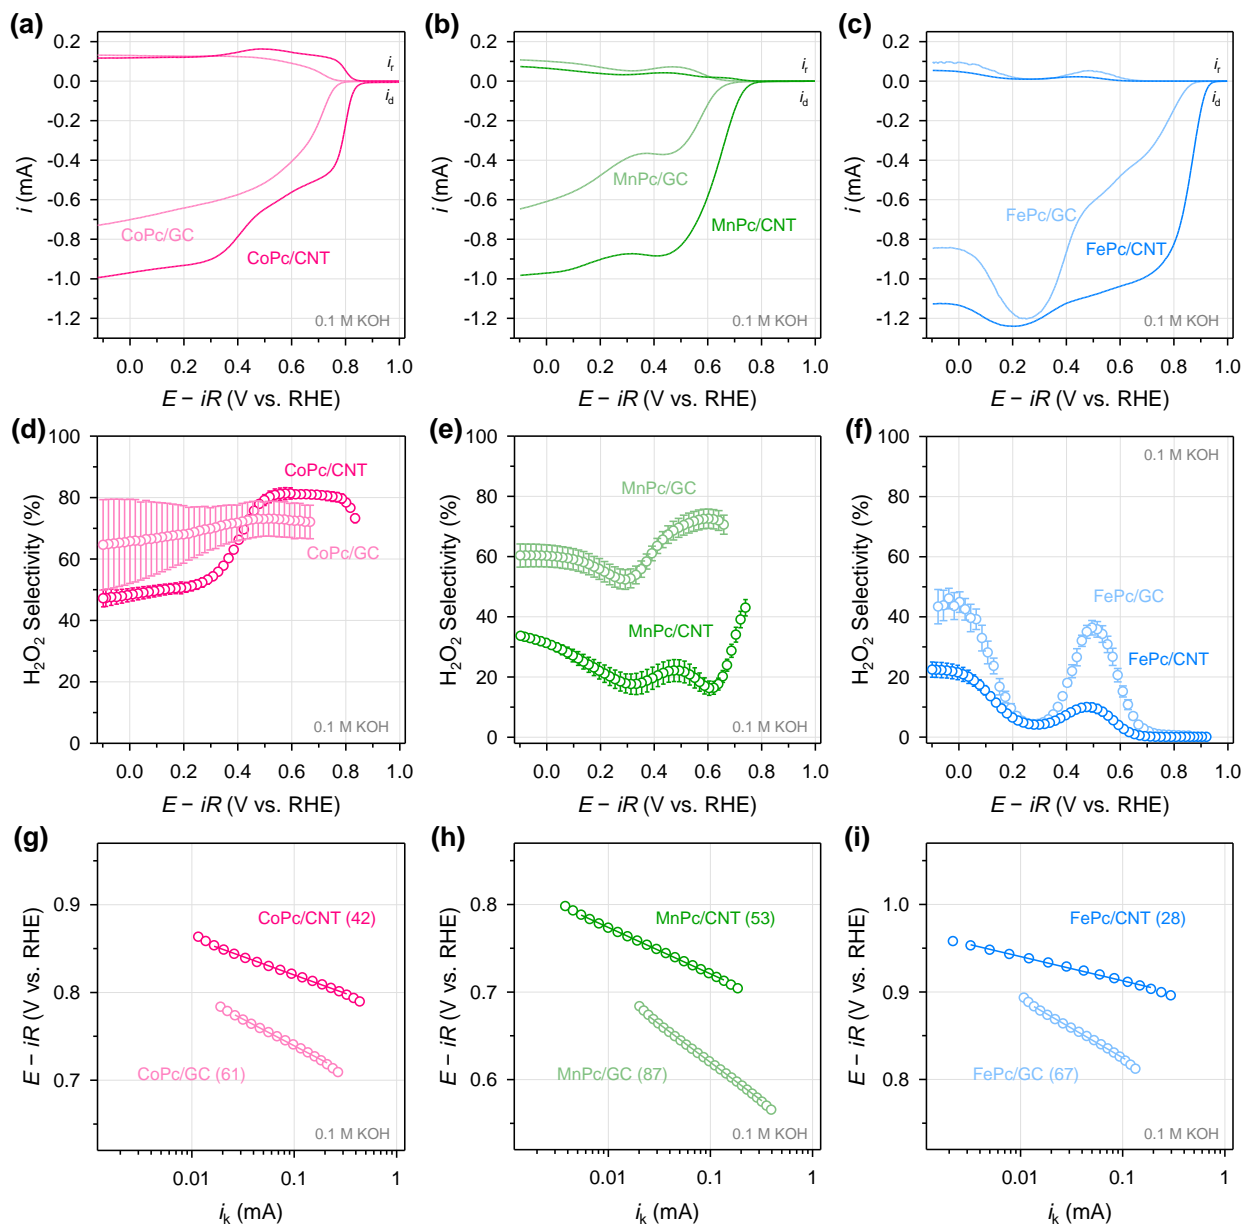

**Fig. S9.** RRDE voltammograms of (a) CoPc/CNT and CoPc/GC, (b) MnPc/CNT and MnPc/GC, and (c) FePc/CNT and FePc/GC measured in  $O_2$ -saturated 0.1 M KOH at an electrode rotation speed of 1600 rpm.  $H_2O_2$  selectivity of (d) CoPc/CNT and CoPc/GC, (e) MnPc/CNT and MnPc/GC, and (f) FePc/CNT and FePc/GC calculated from the RRDE analysis. Tafel plots for (g) CoPc/CNT and CoPc/GC, (h) MnPc/CNT and MnPc/GC, and (i) FePc/CNT and FePc/GC. The numbers in the parenthesis indicate the Tafel slopes in  $mV\ dec^{-1}$ .

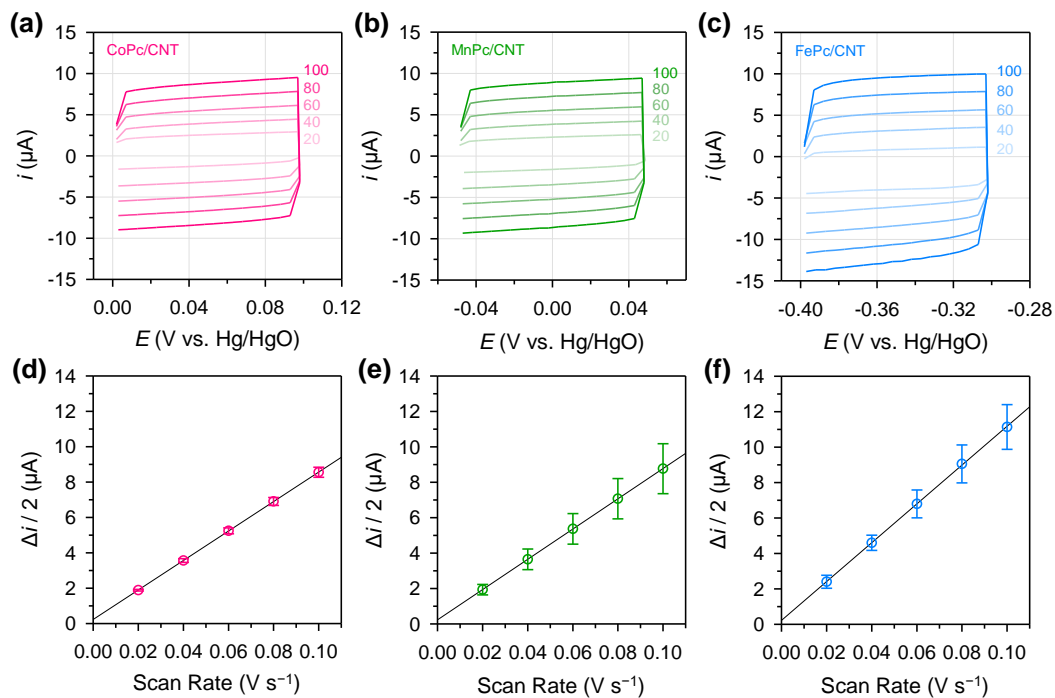

**Fig. S10.** CV curves of (a) CoPc/CNT, (b) MnPc/CNT, and (c) FePc/CNT measured in  $N_2$ -saturated 0.1 M KOH at different potential scan rates. The numbers indicate the scan rates in  $mV s^{-1}$ . The half of the height of the CV curve as a function of the scan rates for (d) CoPc/CNT, (e) MnPc/CNT, and (f) FePc/CNT. The slope corresponds to the double layer capacitance summarized in **Table S3**.

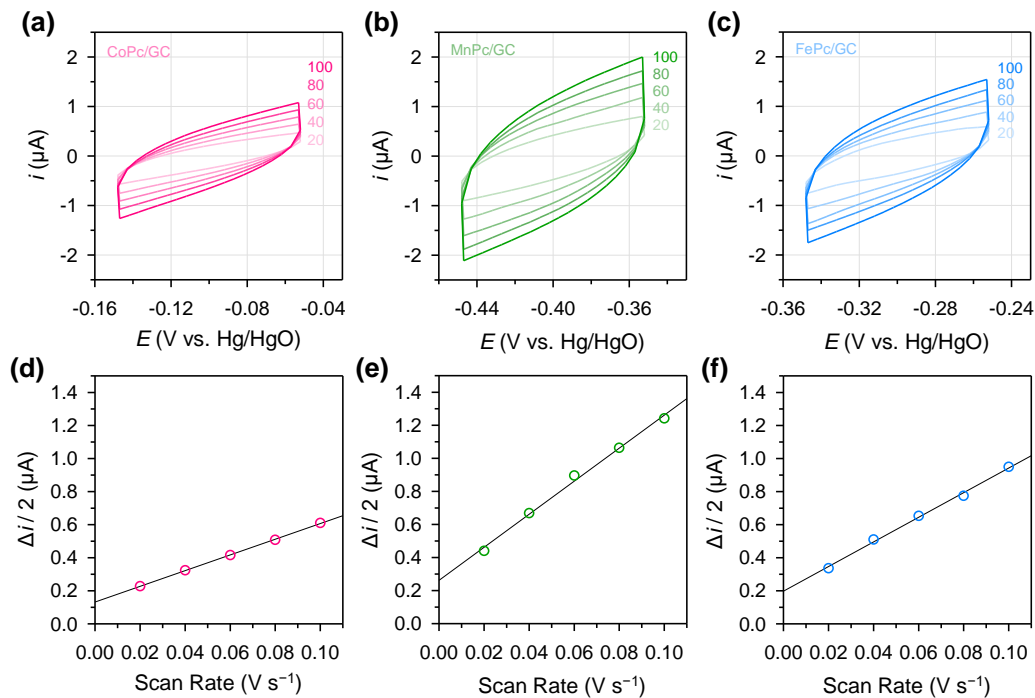

**Fig. S11.** CV curves of (a) CoPc/GC, (b) MnPc/GC, and (c) FePc/GC measured in  $N_2$ -saturated 0.1 M KOH at different potential scan rates. The numbers indicate the scan rates in  $mV s^{-1}$ . The half of the height of the CV curve as a function of the scan rates for (d) CoPc/GC, (e) MnPc/GC, and (f) FePc/GC. The slope corresponds to the double layer capacitance summarized in **Table S3**.

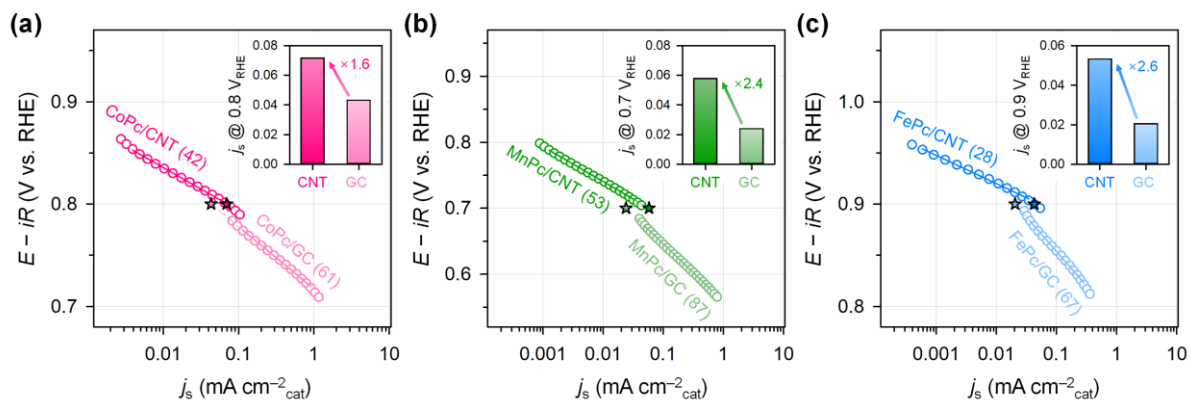

**Fig. S12.** ECSA-normalized specific activity of (a) CoPc/CNT and CoPc/GC, (b) MnPc/CNT and MnPc/GC, and (c) FePc/CNT and FePc/GC in 0.1 M KOH. Inset of (a)–(c) represents a bar graph comparing the specific activity of MPc molecules with and without the CNT support at a potential near the kinetic region. Dotted line and star symbol denote the Tafel extrapolation lines and the specific activity at each potential, respectively. The numbers in the parenthesis indicate the Tafel slopes in mV dec<sup>-1</sup>.



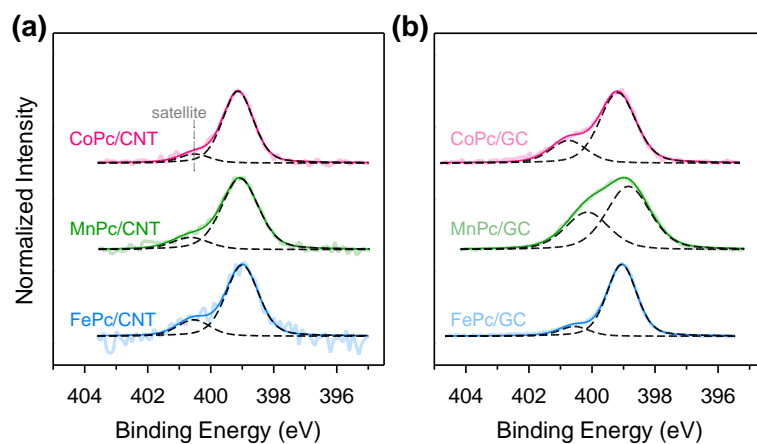

**Fig. S13.** N 1s XPS spectra and deconvoluted peaks of (a) CoPc/CNT, MnPc/CNT, and FePc/CNT and (b) CoPc/GC, MnPc/GC, and FePc/GC.

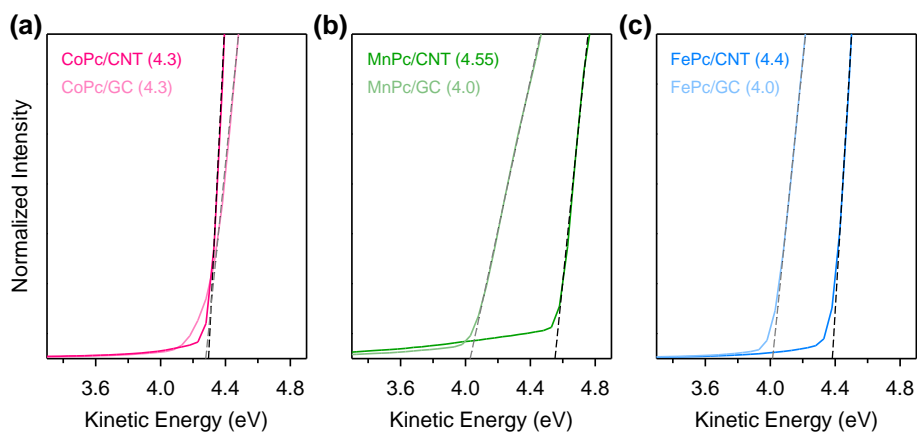

**Fig. S14.** UPS spectra of (a) CoPc/CNT and CoPc/GC, (b) MnPc/CNT and MnPc/GC, and (c) FePc/CNT and FePc/GC at the secondary electron cutoff region. The numbers in the parenthesis indicate the work function values in eV.

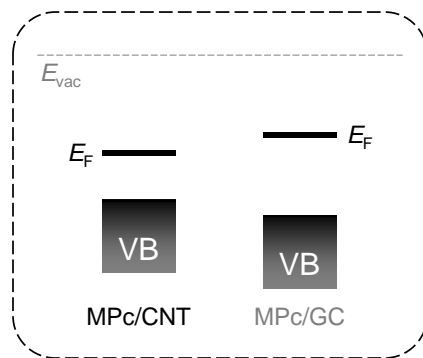

**Fig. S15.** Schematic illustration of the energy states at the valence band region for MPc/CNT and MPc/GC.

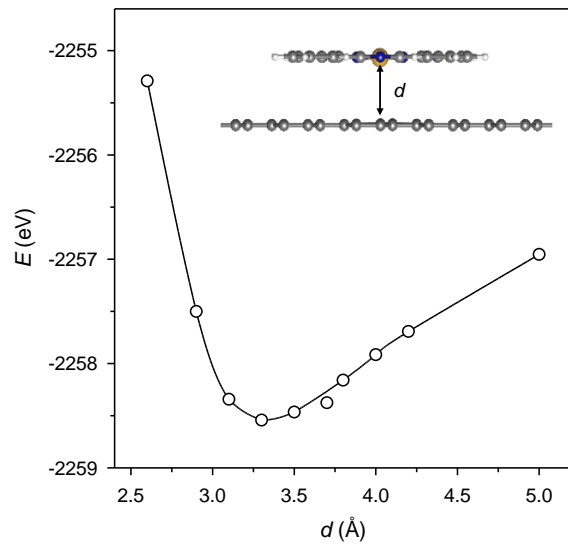

**Fig. S16.** The calculated total DFT energy of MPC/CNT as a function of the interlayer distance,  $d$ .

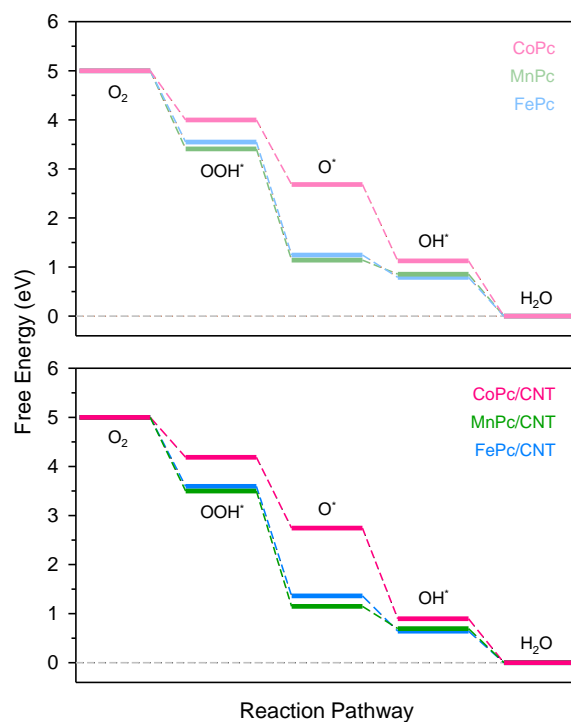

**Fig. S17.** Free-energy diagram of ORR on MPc (upper plot) and MPc/CNT (lower plot) (M = Co, Mn, and Fe) at 0 V (vs. RHE).

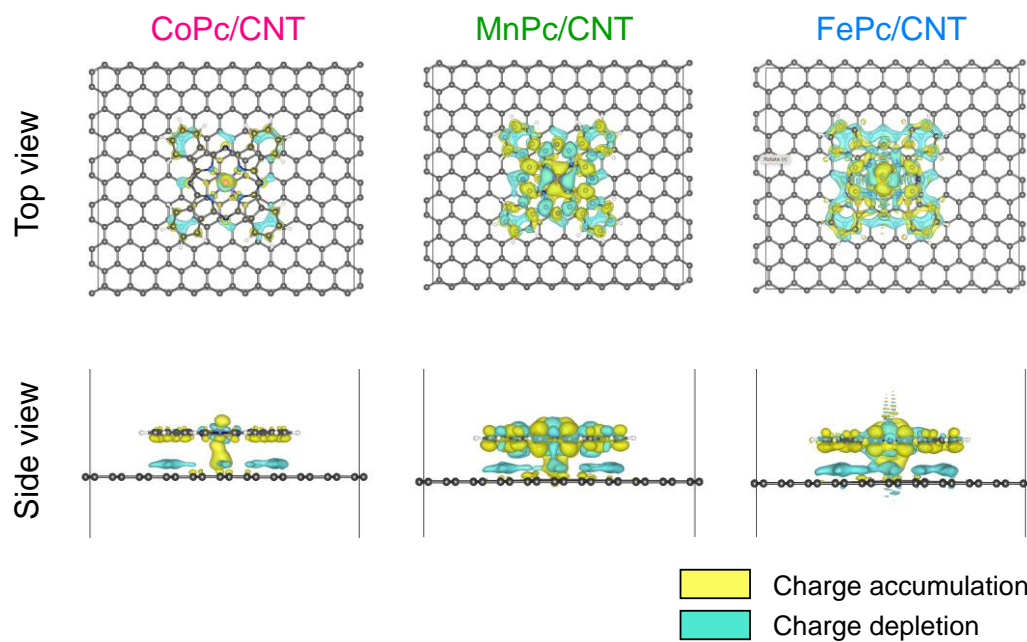

**Fig. S18.** The charge density difference (CDD) of MPc/CNT with an isosurface value of  $0.002 \text{ e}/\text{\AA}^3$ . CDD is calculated as  $\Delta\rho = \rho_{\text{total}} - \rho_{\text{MPc}} - \rho_{\text{CNT}}$ , where  $\rho_{\text{total}}$ ,  $\rho_{\text{MPc}}$ , and  $\rho_{\text{CNT}}$  are charge densities of total system, MPc molecule and CNT support, respectively. The yellow and blue color represent charge accumulation and charge depletion, respectively.

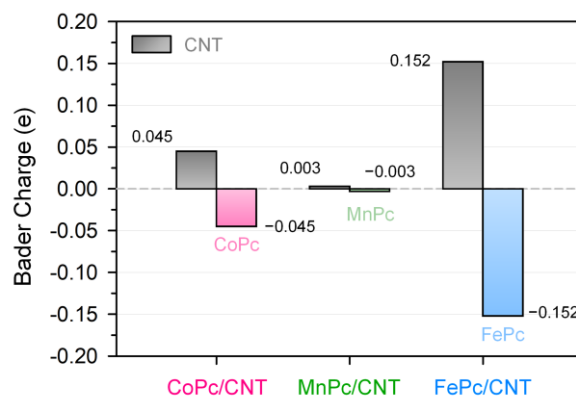

**Fig. S19.** Bader charge analysis of MPC/CNT. The gray and colored bars represent the total Bader charge of CNT and MPC in MPC/CNT, respectively. More positive charge indicates more oxidized states. Thus, the positive Bader charge of CNT indicates that electron transfer is from CNT to MPC.

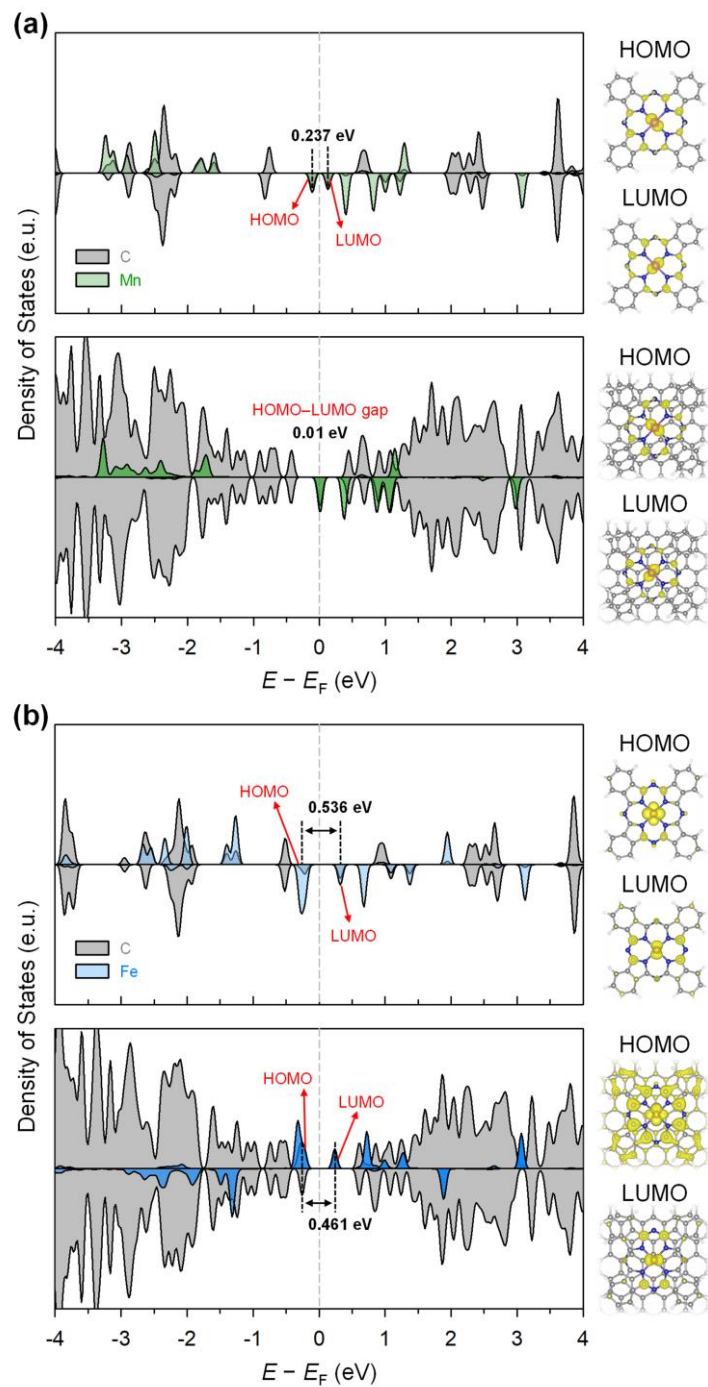

**Fig. S20.** Partial density of states (PDOS) of MPc and MPc/CNT for (a) Mn and (b) Fe. Electron density distributions of HOMO and LUMO are illustrated with an isosurface level of  $0.002 \text{ e}/\text{\AA}^3$ .



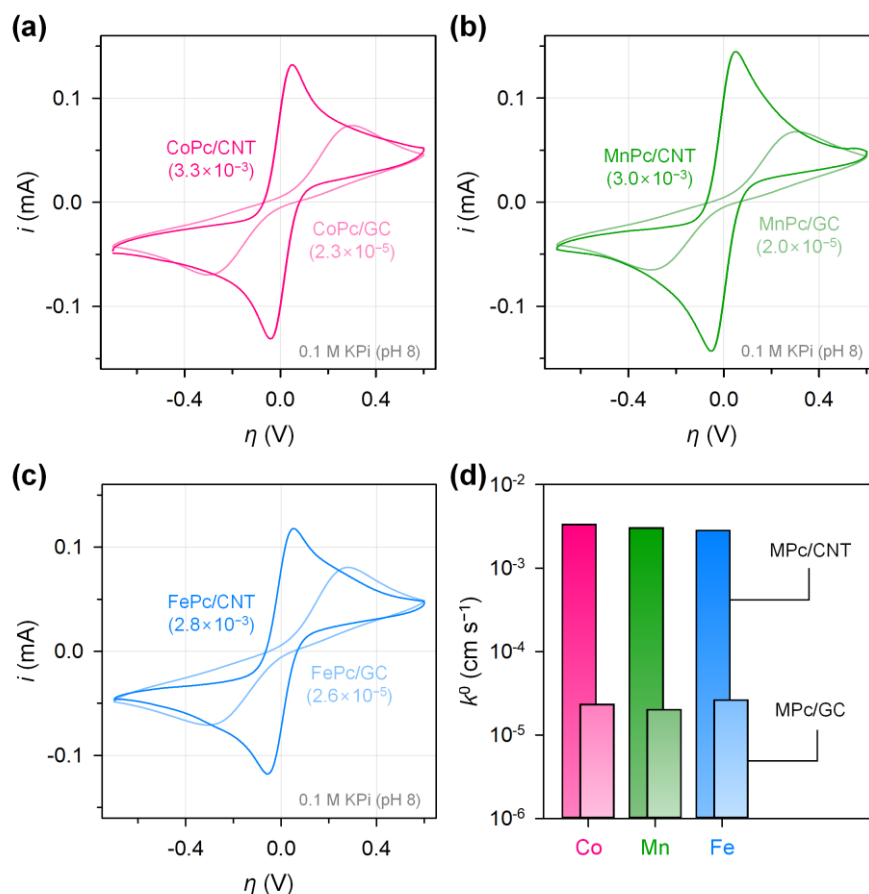

**Fig. S21.** CV curves of (a) CoPc/CNT and CoPc/GC, (b) MnPc/CNT and MnPc/GC, and (c) FePc/CNT and FePc/GC measured in 0.1 M KPi (pH 8) containing 2 mM K<sub>3</sub>[Fe(CN)<sub>6</sub>] + 2 mM K<sub>4</sub>[Fe(CN)<sub>6</sub>] at a scan rate of 100 mV s<sup>-1</sup>. The numbers in the parenthesis indicate the heterogeneous electron transfer (ET) rate constant ( $k^0$ ) in cm s<sup>-1</sup>. (d) The bar graph showing the  $k^0$  values of the MPC/CNT catalysts.

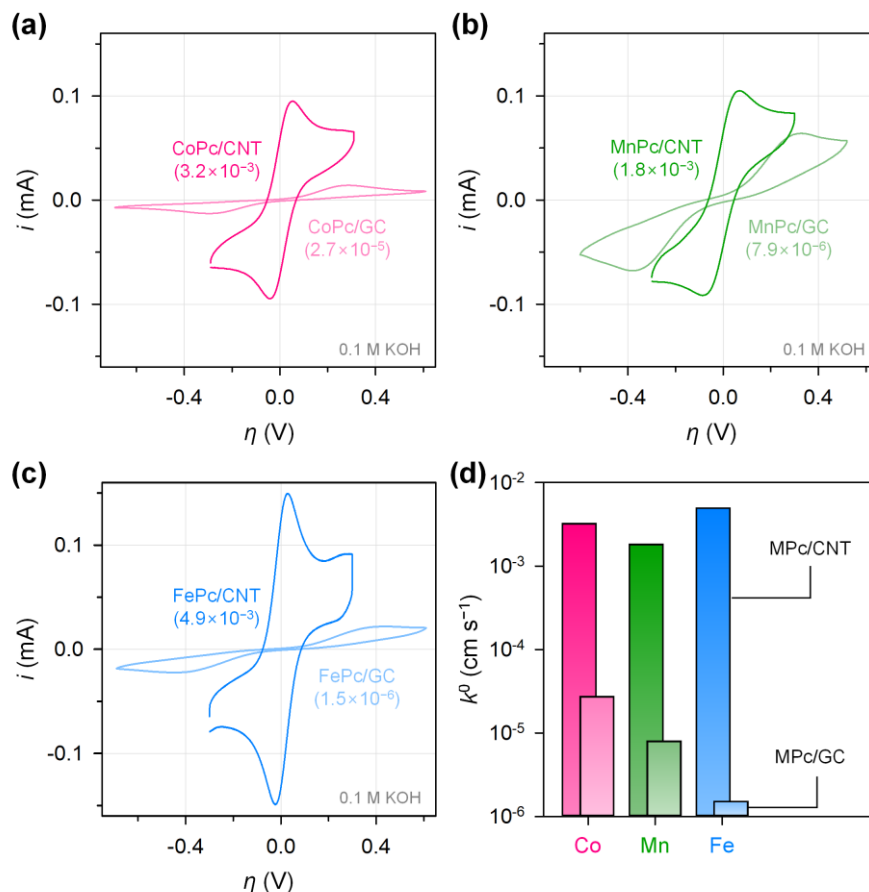

**Fig. S22.** CV curves of (a) CoPc/CNT and CoPc/GC, (b) MnPc/CNT and MnPc/GC, and (c) FePc/CNT and FePc/GC measured in 0.1 M KOH containing 2 mM  $\text{K}_3[\text{Fe}(\text{CN})_6]$  + 2 mM  $\text{K}_4[\text{Fe}(\text{CN})_6]$  at a scan rate of  $100 \text{ mV s}^{-1}$ . The numbers in the parenthesis indicate the heterogeneous ET rate constant ( $k^0$ ) in  $\text{cm s}^{-1}$ . (d) The bar graph showing the  $k^0$  values of the MPc/CNT catalysts.

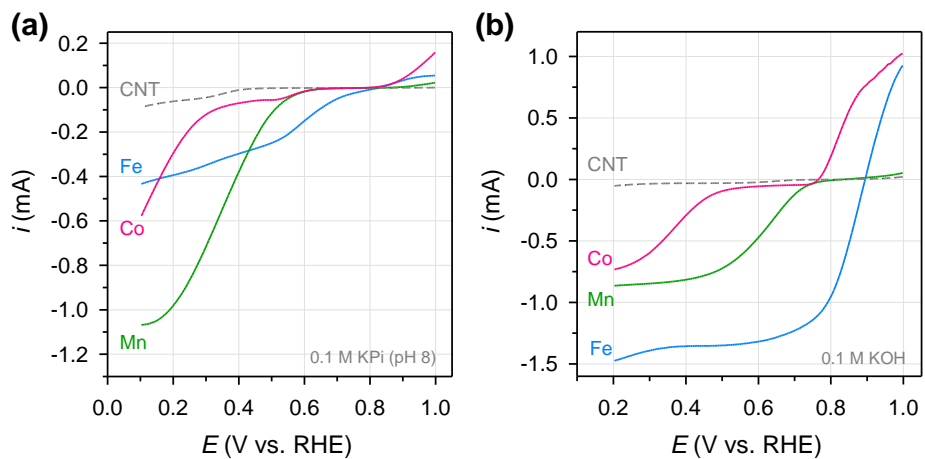

**Fig. S23.** Linear sweep voltammograms of MPc/CNT and CNT showing the hydrogen peroxide reduction reaction (HPRR) activity measured in (a)  $N_2$ -saturated 0.1 M KPi (pH 8) containing 5 mM  $H_2O_2$  and (b)  $N_2$ -saturated 0.1 M KOH containing 5 mM  $H_2O_2$ .

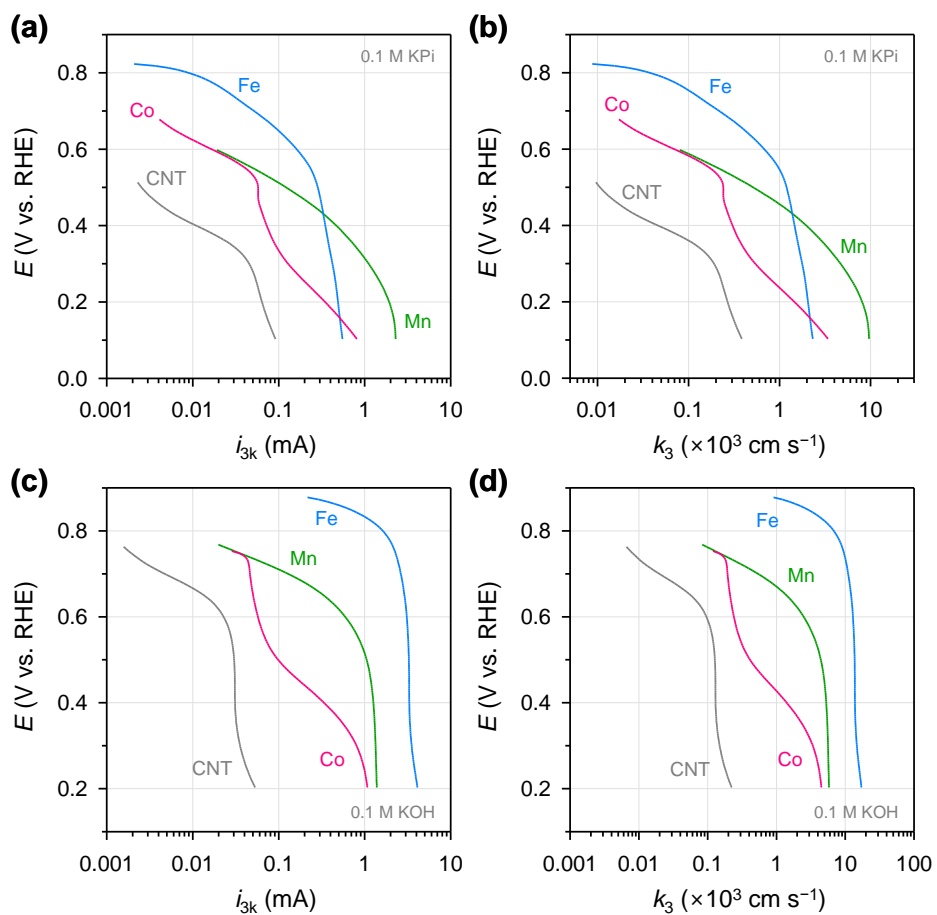

**Fig. S24.** (a) HPRR kinetic current ( $i_{3k}$ ) of MPC/CNT and CNT in 0.1 M KPi (pH 8) and (b) the corresponding rate constant for the HPRR ( $k_3$ ). (c)  $i_{3k}$  of MPC/CNT and CNT in 0.1 M KOH and (d) the corresponding  $k_3$ .

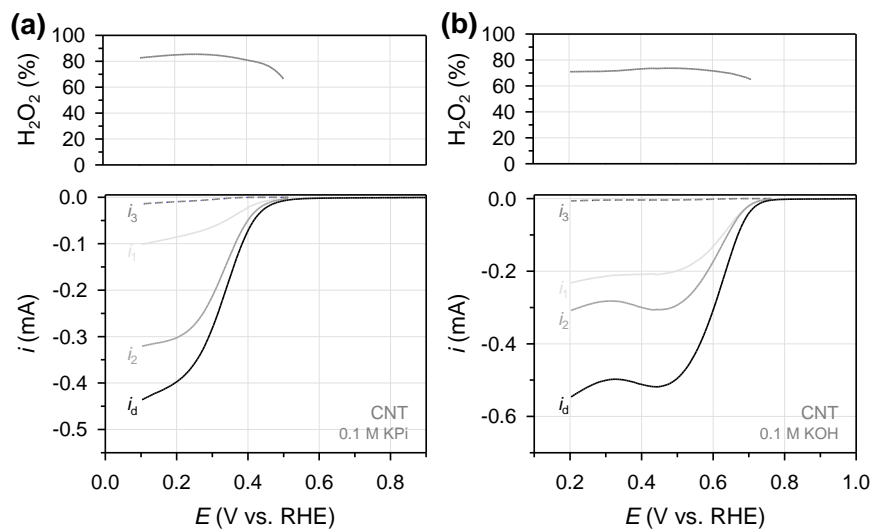

**Fig. S25.** The decoupled linear sweep voltammograms of CNT into  $i_1$ – $i_3$  and the H<sub>2</sub>O<sub>2</sub> selectivity (H<sub>2</sub>O<sub>2</sub> for short) analyzed in (a) 0.1 M KPi (pH 8) and (b) 0.1 M KOH.

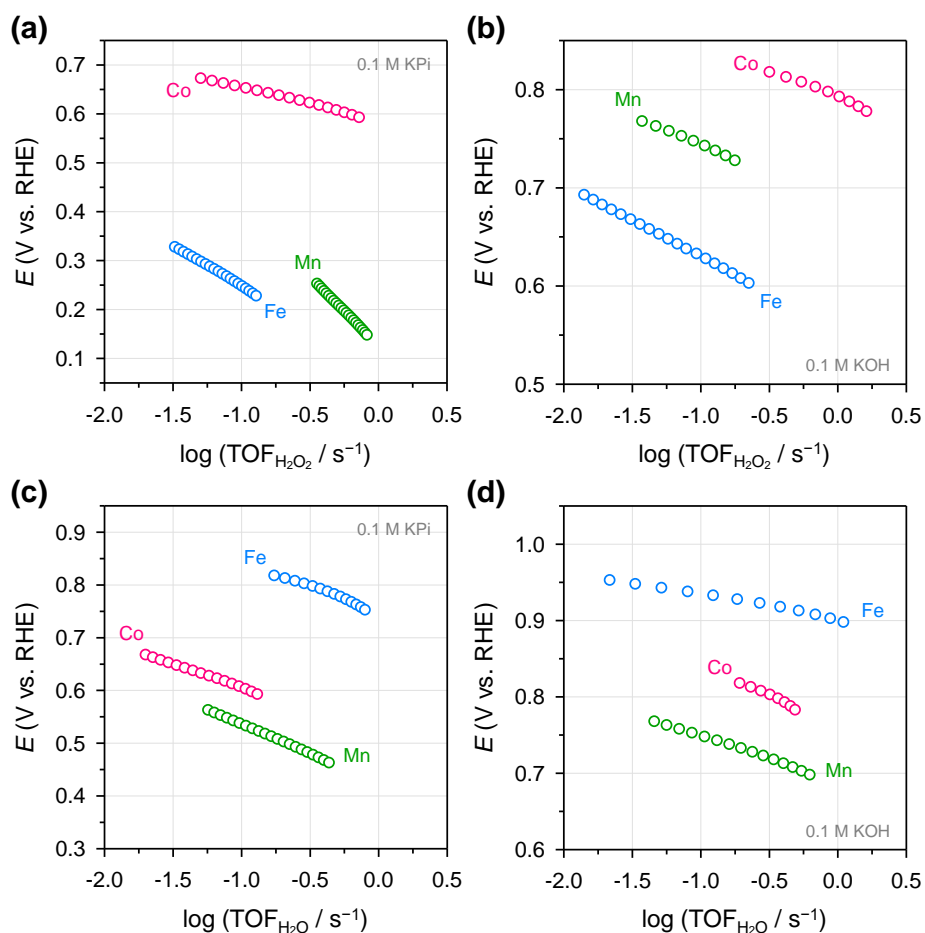

**Fig. S26.** Potential-dependent turnover frequency (TOF) per metal site of MPC/CNT for  $\text{H}_2\text{O}_2$  generation ( $2e^-$  ORR) in (a) 0.1 M KPi and (b) 0.1 M KOH. TOF for  $\text{H}_2\text{O}$  generation ( $4e^-$  ORR) in (c) 0.1 M KPi and (d) 0.1 M KOH

**Table S4.** Summary of turnover frequency (TOF) for the  $2e^-/4e^-$  ORR of CoPc/CNT and FePc/CNT compared with that of previously reported catalysts.

| Catalyst               | TOF ( $s^{-1}$ )   | $E$ (V vs. RHE) | Electrolyte         | Reference <sup>c</sup> |
|------------------------|--------------------|-----------------|---------------------|------------------------|
| CoPc/CNT               | 0.6 <sup>a</sup>   | 0.60            | 0.1 M KPi<br>(pH 8) | This work              |
| CoPc/CNT               | 0.8 <sup>a</sup>   | 0.80            | 0.1 M KOH           | This work              |
| FePc/CNT               | 1.0 <sup>b</sup>   | 0.90            | 0.1 M KOH           | This work              |
| Co <sub>1</sub> -NG(O) | 3.38 <sup>a</sup>  | 0.65            | 0.1 M KOH           | 17                     |
| Co/NC                  | 11.48 <sup>a</sup> | 0.5             | 0.1 M PBS<br>(pH 7) | 55                     |
| CoN <sub>4</sub> -PC   | 2.36 <sup>a</sup>  | 0.65            | 0.1 M KOH           | 56                     |
| Co-N/HPC               | 0.7 <sup>a</sup>   | 0.65            | 0.1 M KOH           | 57                     |
| 3D-G-PFePc             | 0.93 <sup>b</sup>  | 0.9             | 0.1 M KOH           | 58                     |
| CoPc-Py-CNT            | 0.23 <sup>b</sup>  | 0.73            | 0.1 M NaOH          | 59                     |

<sup>a</sup> TOF for the  $2e^-$  ORR

<sup>b</sup> TOF for the  $4e^-$  ORR

<sup>c</sup> Reference numbers referred in the main text

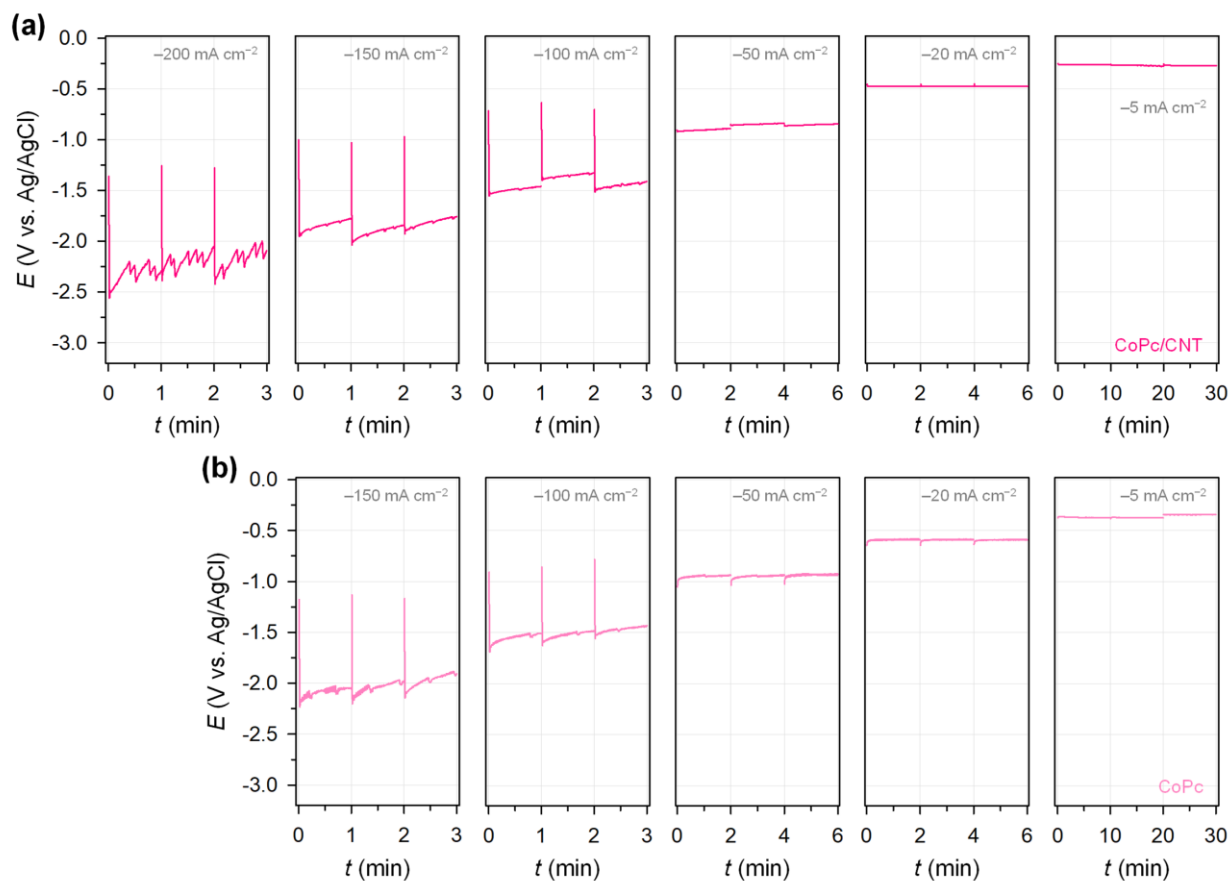

**Fig. S27.** Chronopotentiometry curves obtained at different current densities in a flow electrolyzer with (a) CoPc/CNT-based gas-diffusion electrode (GDE) and (b) CoPc-based GDE as the cathode. The electrolyte was 1 M KPi (pH 8).



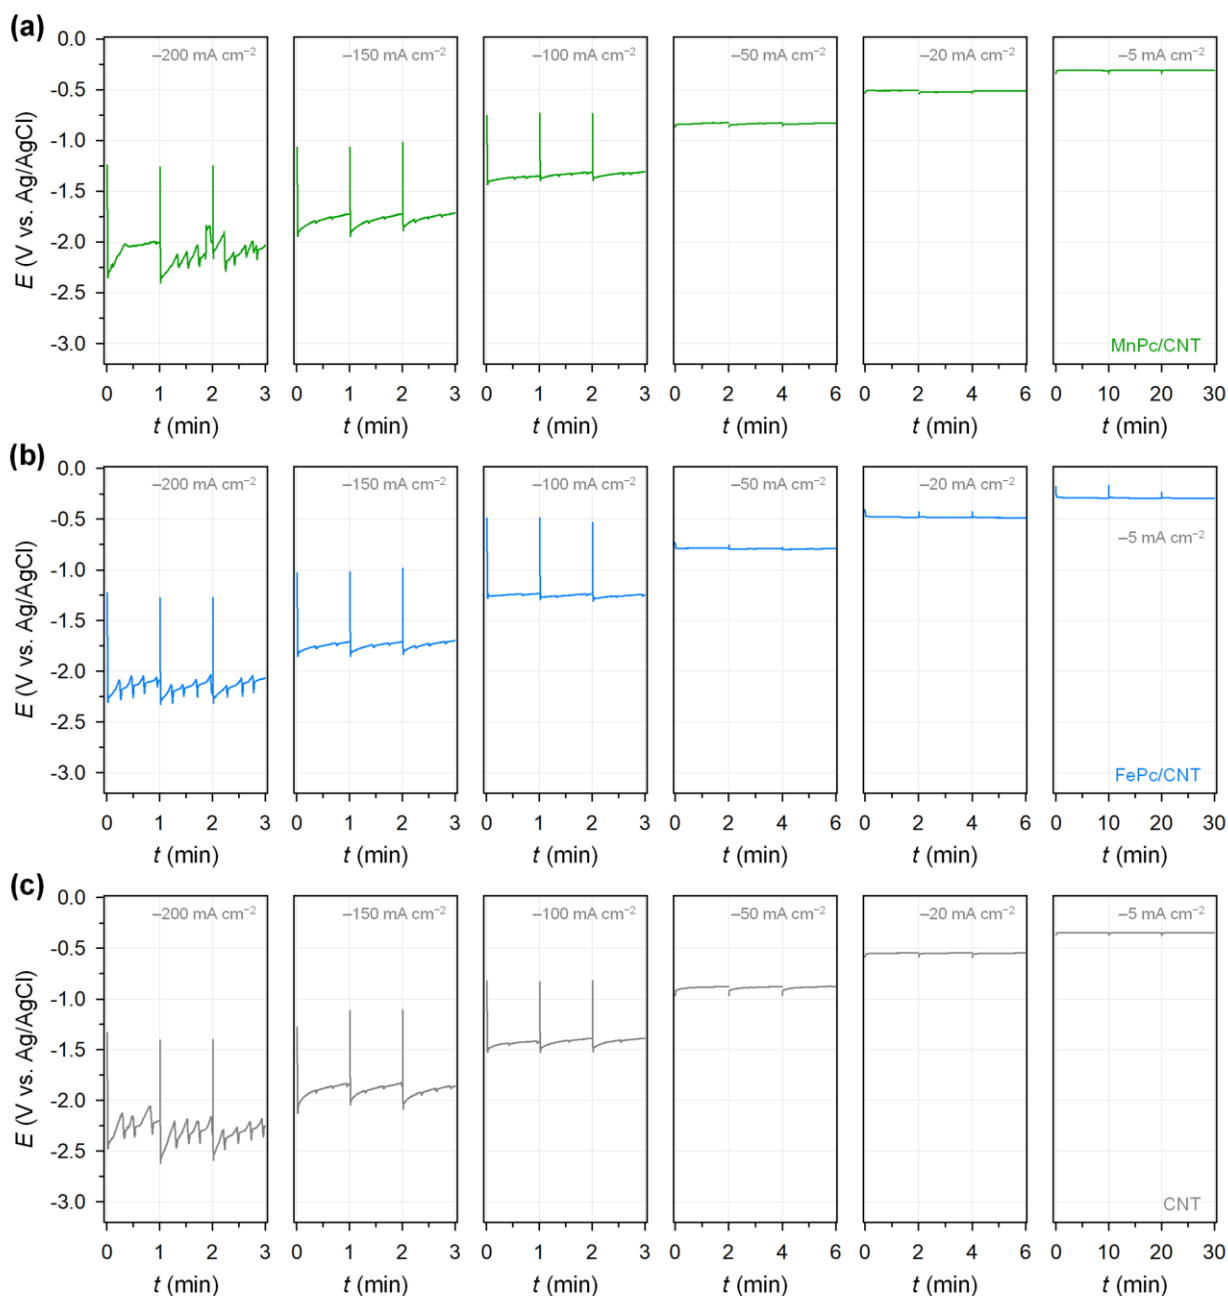

**Fig. S28.** Chronopotentiometry curves obtained at different current densities in a flow electrolyzer with (a) MnPc/CNT-based GDE, (b) FePc/CNT-based GDE, and (c) CNT-based GDE as the cathode. The electrolyte was 1 M KPi (pH 8).

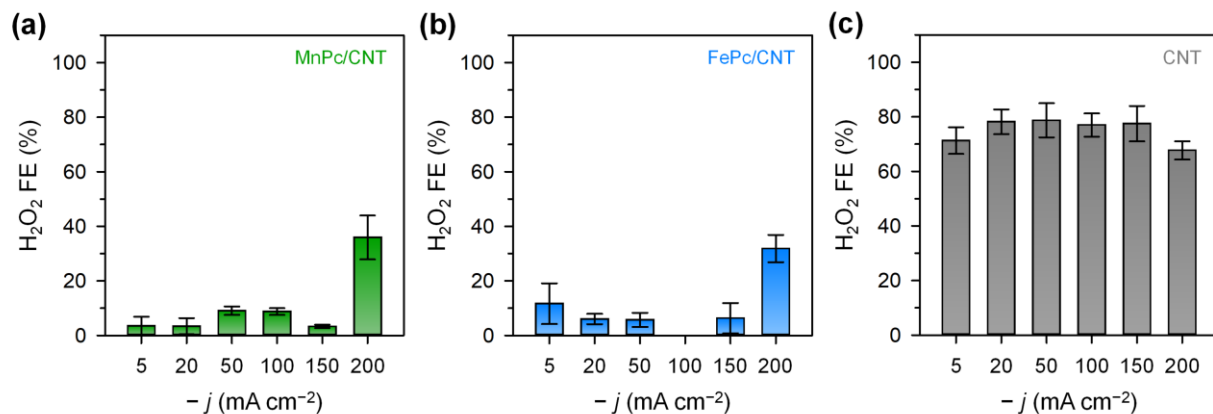

**Fig. S29.**  $\text{H}_2\text{O}_2$  FE as a function of the current densities in the flow electrolyzer measurements with (a) MnPc/CNT-based GDE, (b) FePc-based GDE, and (c) CNT-based GDE as the cathode

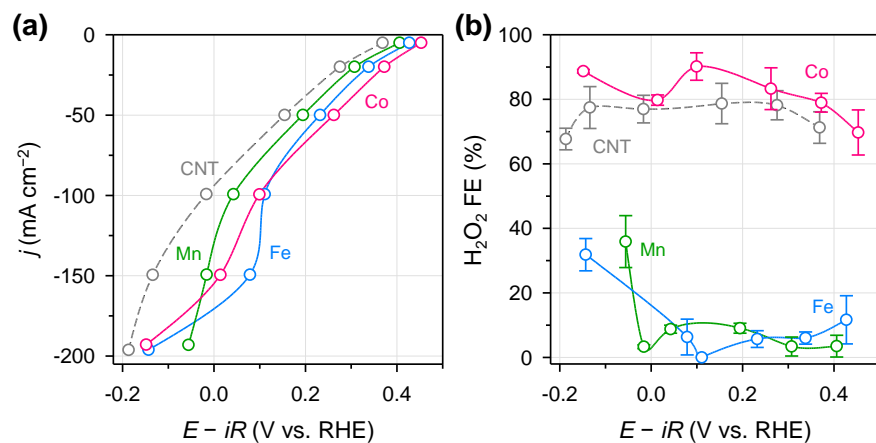

**Fig. S30.** (a) Current density and (b) H<sub>2</sub>O<sub>2</sub> FE as a function of applied potentials in a flow electrolyzer with MPc/CNT- and CNT-based GDE as the cathode.

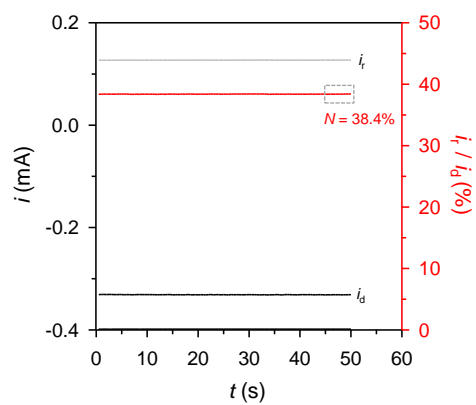

**Fig. S31.** Chronoamperometry curves measured using the catalyst-free rotating ring disk electrode as the working electrode in 2 mM  $\text{K}_3[\text{Fe}(\text{CN})_6]$  + 1 M KCl.

**Table S5.** The Gibbs free energy correction values for gas molecule and adsorbates.

| (eV)                    |                  | <i>ZPE</i> | $\int c_p dT$ | <i>-TS</i> | <b>Sum</b> |
|-------------------------|------------------|------------|---------------|------------|------------|
| <b>Gaseous molecule</b> | H <sub>2</sub>   | 0.270      | 0.086         | -0.403     | -0.043     |
|                         | H <sub>2</sub> O | 0.566      | 0.103         | -0.673     | -0.004     |
| <b>Adsorbate</b>        | O*               | 0.025      | 0.048         | -0.013     | 0.190      |
|                         | OH*              | 0.326      | 0.001         | -0.001     | 0.326      |
|                         | OOH*             | 0.393      | 0.048         | -0.102     | 0.339      |
